# Supplementary material for: Longitudinal risk of herpes zoster in patients with non-Hodgkin lymphoma receiving chemotherapy: A nationwide population-based study
Source: PubMed Central journal article supplement (PMC4585724; doi:10.1038/srep14008), 2015-09-22
Supplement: srep14008-s1.pdf [file srep14008-s1.pdf]

## **SUPPORTING MATERIAL**

### **Longitudinal risk of herpes zoster in patients with non-Hodgkin lymphoma receiving chemotherapy: A nationwide population-based study**

Shih-Feng Cho<sup>1, 2</sup>, Wan-Hsuan Wu<sup>3</sup>, Yi-Hsin Yang<sup>4</sup>, Yi-Chang Liu<sup>2</sup>, Hui-Hua Hsiao<sup>2</sup>, Chao-Sung Chang<sup>3, 5\*</sup>

1. Graduate Institute of Clinical Medicine, College of Medicine, Kaohsiung Medical University, Kaohsiung, Taiwan
2. Division of Hematology & Oncology, Department of Internal Medicine, Kaohsiung Medical University Hospital, Kaohsiung Medical University, Kaohsiung, Taiwan
3. School of Medicine, I-Shou University, Kaohsiung, Taiwan
4. School of Pharmacy, Kaohsiung Medical University, Kaohsiung, Taiwan
5. Division of Hematology and Oncology, E-Da Hospital, Kaohsiung, Taiwan

#### **Correspondence to: Prof. Chao-Sung Chang\***

Affiliation: Division of Hematology and Oncology, E-Da Hospital, Kaohsiung, Taiwan

Address: No.1, Yida Road, Jiaosu Village, Yanchao District, Kaohsiung City 82445, Taiwan

Tel: +886 76150011

Fax: +886 76150940

E-mail: ccschang@gmail.com

## Material and Methods

**Supplementary Table S1.** Specific number of patients enrolled in each year of 2002-2008.

| Year | All NHL patients<br>( <i>n</i> = 3865) | R-CHOP/R-CEOP<br>( <i>n</i> = 1677) | CHOP/CEOP<br>( <i>n</i> = 2188) |
|------|----------------------------------------|-------------------------------------|---------------------------------|
| 2002 | 548                                    | 52                                  | 496                             |
| 2003 | 489                                    | 81                                  | 408                             |
| 2004 | 522                                    | 164                                 | 358                             |
| 2005 | 509                                    | 195                                 | 314                             |
| 2006 | 579                                    | 363                                 | 216                             |
| 2007 | 605                                    | 431                                 | 174                             |
| 2008 | 613                                    | 391                                 | 222                             |

Note: There were 129 patients with follow-up of 7 years, including 7 in the R-CHOP/R-CEOP group and 122 in the CHOP/CEOP group.
